# Supplementary material for: Genetic variability in the sdrD gene in Staphylococcus aureus from healthy nasal carriers
Source: BMC Microbiol. 2018 Apr 16;18:34. doi: 10.1186/s12866-018-1179-7 (PMC5902956; doi:10.1186/s12866-018-1179-7)
Supplement: Supplementary file 1 — Multiple Sequence Alignment of nucleotide sequences of SdrD A region for 48 queried and 6 reference strains. Consensus residues within the residues are indicated as conserved (*) and semi-conserved (.). Deletion and insertions are indicated as (−). (PDF 3240 kb) [file 12866_2018_1179_MOESM1_ESM.pdf]

[illegible]





NCTC8325 661 ATATTATTCATTAAAAATCACA...  
Newman 661 ATATTATTCATTAAAAATCACA...  
Isolate.13 661 ATATTATTCATTAAAAATCACA...  
Isolate.36 661 ATATTATTCATTAAAAATCACA...  
Isolate.35 661 ATATTATTCATTAAAAATCACA...  
Isolate.20 661 ATATTATTCATTAAAAATCACA...  
Isolate.4 661 ATATTATTCATTAAAAATCACA...  
Isolate.8 661 ATATTATTCATTAAAAATCACA...  
Isolate.25 661 ATATTATTCATTAAAAATCACA...  
MW2 661 ATATTATTCATTAAAAATCACA...  
MSSA476 661 ATATTATTCATTAAAAATCACA...  
Isolate.2 661 ATATTATTCATTAAAAATCACA...  
Isolate.6 661 ATATTATTCATTAAAAATCACA...  
Isolate.7 661 ATATTATTCATTAAAAATCACA...  
Isolate.39 661 ATATTATTCATTAAAAATCACA...  
Isolate.42 661 ATATTATTCATTAAAAATCACA...  
Isolate.22 661 ATATTATTCATTAAAAATCACA...  
Isolate.10 661 ATATTATTCATTAAAAATCACA...  
Isolate.21 661 ATATTATTCATTAAAAATCACA...  
Isolate.30 661 ATATTATTCATTAAAAATCACA...  
Isolate.27 661 ATATTATTCATTAAAAATCACA...  
Isolate.43 661 ATATTATTCATTAAAAATCACA...  
Isolate.49 661 ATATTATTCATTAAAAATCACA...  
Isolate.9 661 ATATTATTCATTAAAAATCACA...  
Isolate.3 661 ATATTATTCATTAAAAATCACA...  
Isolate.44 661 ATATTATTCATTAAAAATCACA...  
H050960412 661 ATATTATTCATTAAAAATCACA...  
Isolate.46 661 ATATTATTCATTAAAAATCACA...  
N15 661 ATATTATTCATTAAAAATCACA...  
Isolate.12 661 ATATTATTCATTAAAAATCACA...  
Isolate.14 661 ATATTATTCATTAAAAATCACA...  
Isolate.15 661 ATATTATTCATTAAAAATCACA...  
Isolate.17 661 ATATTATTCATTAAAAATCACA...  
Isolate.19 661 ATATTATTCATTAAAAATCACA...  
Isolate.26 661 ATATTATTCATTAAAAATCACA...  
Isolate.50 661 ATATTATTCATTAAAAATCACA...  
Isolate.1 661 ATATTATTCATTAAAAATCACA...  
Isolate.11 661 ATATTATTCATTAAAAATCACA...  
Isolate.18 661 ATATTATTCATTAAAAATCACA...  
Isolate.28 632 ATATTATTCATTAAAAATCACA...  
Isolate 625 ATATTATTCATTAAAAATCACA...  
Isolate.23 651 ATATTATTCATTAAAAATCACA...  
Isolate.37 661 ATATTATTCATTAAAAATCACA...  
Isolate.45 661 ATATTATTCATTAAAAATCACA...  
Isolate.41 661 ATATTATTCATTAAAAATCACA...  
Isolate.48 661 ATATTATTCATTAAAAATCACA...  
Isolate.24 659 ATATTATTCATTAAAAATCACA...  
Isolate.47 659 ATATTATTCATTAAAAATCACA...  
Isolate.38 659 ATATTATTCATTAAAAATCACA...  
Isolate.31 658 ATATTATTCATTAAAAATCACA...  
Isolate.32 661 ATATTATTCATTAAAAATCACA...  
Isolate.33 661 ATATTATTCATTAAAAATCACA...  
Isolate.51 661 ATATTATTCATTAAAAATCACA...  
Isolate.29 661 ATATTATTCATTAAAAATCACA...  
consensus 661

NCTC8325 771 GATATTA...  
Newman 771 GATATTA...  
Isolate.13 771 GATATTA...  
Isolate.36 771 GATATTA...  
Isolate.35 771 GATATTA...  
Isolate.20 771 GATATTA...  
Isolate.4 771 GATATTA...  
Isolate.8 771 GATATTA...  
Isolate.25 771 GATATTA...  
MW2 771 GATATTA...  
MSSA476 771 GATATTA...  
Isolate.2 771 GATATTA...  
Isolate.6 771 GATATTA...  
Isolate.7 771 GATATTA...  
Isolate.39 771 GATATTA...  
Isolate.42 771 GATATTA...  
Isolate.22 771 GATATTA...  
Isolate.10 771 GATATTA...  
Isolate.21 771 GATATTA...  
Isolate.30 771 GATATTA...  
Isolate.27 771 GATATTA...  
Isolate.43 771 GATATTA...  
Isolate.49 771 GATATTA...  
Isolate.9 771 GATATTA...  
Isolate.3 771 GATATTA...  
Isolate.44 771 GATATTA...  
H050960412 771 GATATTA...  
Isolate.46 771 GATATTA...  
N15 771 GATATTA...  
Isolate.12 771 GATATTA...  
Isolate.14 771 GATATTA...  
Isolate.15 771 GATATTA...  
Isolate.17 771 GATATTA...  
Isolate.19 771 GATATTA...  
Isolate.26 771 GATATTA...  
Isolate.50 771 GATATTA...  
Isolate.1 771 GATATTA...  
Isolate.11 771 GATATTA...  
Isolate.18 771 GATATTA...  
Isolate.28 742 GATATTA...  
Isolate.735 771 GATATTA...  
Isolate.23 771 GATATTA...  
Isolate.37 771 GATATTA...  
Isolate.45 771 GATATTA...  
Isolate.41 769 GATATTA...  
Isolate.48 769 GATATTA...  
Isolate.24 769 GATATTA...  
Isolate.47 769 GATATTA...  
Isolate.38 769 GATATTA...  
Isolate.31 768 GATATTA...  
Isolate.32 767 GATATTA...  
Isolate.33 767 GATATTA...  
Isolate.51 769 GATATTA...  
Isolate.29 770 GATATTA...  
consensus 771

NCTC8325 881
Newman 881
Isolate\_13 881
Isolate\_36 881
Isolate\_35 881
Isolate\_20 881
Isolate\_4 881
Isolate\_8 881
Isolate\_25 881
MH2 881
MS5476 881
Isolate\_2 881
Isolate\_6 881
Isolate\_7 881
Isolate\_39 881
Isolate\_42 881
Isolate\_22 881
Isolate\_10 881
Isolate\_21 881
Isolate\_30 881
Isolate\_27 880
Isolate\_43 881
Isolate\_49 881
Isolate9 881
Isolate3 881
Isolate\_44 881
H05096042 881
Isolate\_46 880
N15 881
Isolate\_12 881
Isolate\_14 881
Isolate\_15 881
Isolate\_17 881
Isolate\_19 881
Isolate\_26 880
Isolate\_50 880
Isolate\_1 881
Isolate\_11 881
Isolate\_18 881
Isolate\_28 852
Isolate 845
Isolate\_23 881
Isolate\_37 880
Isolate\_45 880
Isolate\_41 879
Isolate\_48 879
Isolate\_2 879
Isolate\_47 879
Isolate\_38 879
Isolate\_31 878
Isolate\_32 877
Isolate\_33 880
Isolate\_51 879
Isolate\_29 880
consensus 881

NCTC8325 991
Newman 991
Isolate\_13 991
Isolate\_36 991
Isolate\_35 991
Isolate\_20 991
Isolate\_4 991
Isolate\_8 991
Isolate\_25 991
MH2 991
MS5476 991
Isolate\_2 991
Isolate\_6 991
Isolate\_7 991
Isolate\_39 991
Isolate\_42 991
Isolate\_22 991
Isolate\_10 991
Isolate\_21 991
Isolate\_30 990
Isolate\_27 990
Isolate\_43 991
Isolate49 991
Isolate9 991
Isolate3 991
Isolate\_44 991
H05096042 991
Isolate\_46 990
N15 991
Isolate\_12 991
Isolate\_14 991
Isolate\_15 991
Isolate\_17 991
Isolate\_19 991
Isolate\_26 990
Isolate\_50 990
Isolate\_1 991
Isolate\_11 991
Isolate\_18 991
Isolate\_28 962
Isolate 955
Isolate\_23 990
Isolate\_37 990
Isolate\_45 990
Isolate\_41 989
Isolate\_48 989
Isolate\_24 989
Isolate\_47 989
Isolate\_38 989
Isolate\_31 988
Isolate\_32 987
Isolate\_33 990
Isolate\_51 989
Isolate\_29 990
consensus 991

NCTC8325 1101  
Newman 1101  
Isolate.13 1101  
Isolate.36 1101  
Isolate.35 1101  
Isolate.20 1101  
Isolate.4 1101  
Isolate.8 1101  
Isolate.25 1101  
MW2 1101  
MS8476 1101  
Isolate.2 1101  
Isolate.6 1101  
Isolate.7 1101  
Isolate.39 1101  
Isolate.42 1101  
Isolate.22 1101  
Isolate.10 1101  
Isolate.21 1101  
Isolate.30 1101  
Isolate.27 1101  
Isolate.43 1101  
Isolate.49 1101  
Isolate.9 1101  
Isolate.3 1101  
Isolate.44 1101  
H050960412 1101  
Isolate.46 1101  
N15 1101  
Isolate.12 1101  
Isolate.14 1101  
Isolate.15 1101  
Isolate.17 1101  
Isolate.19 1101  
Isolate.26 1101  
Isolate.50 1101  
Isolate.1 1101  
Isolate.11 1101  
Isolate.18 1101  
Isolate.28 1072  
Isolate 1065  
Isolate.32 1091  
Isolate.37 1100  
Isolate.45 1100  
Isolate.41 1099  
Isolate.48 1099  
Isolate.24 1099  
Isolate.47 1099  
Isolate.38 1099  
Isolate.31 1098  
Isolate.32 1098  
Isolate.33 1100  
Isolate.51 1099  
Isolate.29 1100  
consensus 1101

NCTC8325 1211  
Newman 1211  
Isolate.13 1211  
Isolate.36 1211  
Isolate.35 1211  
Isolate.20 1211  
Isolate.4 1211  
Isolate.8 1211  
Isolate.25 1211  
MW2 1211  
MS8476 1211  
Isolate.2 1211  
Isolate.6 1211  
Isolate.7 1211  
Isolate.39 1211  
Isolate.42 1211  
Isolate.22 1211  
Isolate.10 1211  
Isolate.21 1211  
Isolate.30 1210  
Isolate.27 1210  
Isolate.43 1211  
Isolate.49 1211  
Isolate.9 1211  
Isolate.3 1211  
Isolate.44 1211  
H050960412 1211  
Isolate.46 1210  
N15 1211  
Isolate.12 1211  
Isolate.14 1211  
Isolate.15 1211  
Isolate.17 1211  
Isolate.19 1211  
Isolate.26 1211  
Isolate.50 1210  
Isolate.1 1211  
Isolate.11 1211  
Isolate.18 1211  
Isolate.28 1182  
Isolate 1175  
Isolate.23 1210  
Isolate.37 1210  
Isolate.45 1210  
Isolate.41 1209  
Isolate.48 1209  
Isolate.24 1209  
Isolate.47 1209  
Isolate.38 1209  
Isolate.31 1208  
Isolate.32 1207  
Isolate.33 1210  
Isolate.51 1209  
Isolate.29 1210  
consensus 1211
